# Supplementary material for: Comparative Study of the Priming Effect of Abscisic Acid on Tolerance to Saline and Alkaline Stresses in Rice Seedlings
Source: MDPI journal article supplement (doi:10.3390/agronomy13112698), 2023-10-26
Supplement: s1 [file s1]

**Table. S1.** List of primers used in quantitative real-time PCR analysis

| Gene name           | ID           | Primer-Forward         | Primer-Reverse          |
|---------------------|--------------|------------------------|-------------------------|
| <i>OsActin</i>      | Os03g0718100 | TTCCAGCCTTCCTTCATA     | AACGATGTTGCCATATAGAT    |
| <i>OsNCED2</i>      | Os12g0435200 | TACGCCAAGGATGAGTCAG    | CCTCTCCATCAGCCTCTTC     |
| <i>OsNCED3</i>      | Os03g0645900 | GCTCGGTCTCACACACTC     | GCTCCCTCTGGTCACTTCC     |
| <i>OsSalt</i>       | Os01t0348900 | CGAAATAATGTTCCATGGTGTT | TGTACTACGGATCGGTGCAA    |
| <i>OsWsi18</i>      | Os01g0705200 | TGTGACTCGATCCAGCGTAG   | GTTCTGCTGAGAAGCCATC     |
| <i>OsHKT1;5</i>     | Os01g0307500 | CCTGCCACCTTACACCACTT   | AGCTTCTGCCATATGCTGCT    |
| <i>OsSOS1</i>       | Os12g0641100 | CTGGGCCTTGCTTTTGGAAT   | ATTCCCAGTGTCATGACGGT    |
| <i>OsNHX5</i>       | Os09g0286400 | TCACTGCCCTTGACAGGAAC   | GTCAGGTGGCAACTCATCCA    |
| <i>Os Cu/Zn-SOD</i> | Os08g0561700 | TGTGACGGGACTTACTCCTGG  | CACCCATTCGTAGTATCGCCA   |
| <i>OsFeSOD</i>      | Os06g0143000 | ATGGGGATGGGGATGAGGAG   | TCAGAACGGGACCATGCCCA    |
| <i>OsPOX1</i>       | Os01g0263300 | ACAACAACCTCTTCCCGCTA   | ATCCAGTCAGAGGCGAGATG    |
| <i>OsCATA</i>       | Os02g0115700 | CCCCAAGGTCTCCCCTGA     | AACGACTCATCACACTGGGAGAG |
| <i>OsAPX1</i>       | Os03g0285700 | TCCACCCAGGAAGGGAGG     | TTGGTAGCATCAGGAAGACGG   |
| <i>OsRbohA</i>      | Os01g0734200 | ATCCGCAAAATAAGCACCTCT  | CAGTAGCCCATCACATCAAAGAC |
